# Supplementary material for: SPEN, a new player in primary cilia formation and cell migration in breast cancer
Source: PubMed Central journal article supplement (PMC5588740; doi:10.1186/s13058-017-0897-3), 2017-09-06
Supplement: 13058_2017_897_MOESM1_ESM.pdf [file 13058_2017_897_MOESM1_ESM.pdf]

| <b>T47D</b> |
|-------------|
| AK7         |
| AK8         |
| ARL6        |
| B9D2        |
| BBS5        |
| CC2D2A      |
| CCDC103     |
| CCDC114     |
| CCDC39      |
| CCDC40      |
| DNAAF1      |
| DNAH2       |
| DNAH5       |
| DNAH6       |
| DNAI1       |
| FAM161A     |
| FOXJ1       |
| HYDIN       |
| LRRC6       |
| MAK         |
| NME5        |
| NPHP1       |
| RFX3        |
| ROPN1L      |
| RPGR        |
| RSPH1       |
| RSPH4A      |
| RSPH9       |
| SPEF2       |
| TEKT2       |
| TMEM231     |
| TMEM67      |
| TTC26       |
| TTLL9       |
| WDR35       |
| WDR78       |

| <b>MCF10A</b> |
|---------------|
| CCDC41        |
| CEP97         |
| DISC1         |
| DPCD          |
| FAM161A       |
| KIF24         |
| MNS1          |
| NEK2          |
| NUP35         |
| ORC1          |
| PLK1          |
| POC1A         |
| PTCH1         |
| RAB17         |
| RAB3IP        |
| RFX3          |
| SASS6         |
| SPA17         |
| SPEF2         |
| STIL          |
| TCTN2         |
| TRAPPC3       |
| TTK           |
| USH1G         |
| WDR60         |
