# Supplementary material for: SPEN, a new player in primary cilia formation and cell migration in breast cancer
Source: PubMed Central journal article supplement (PMC5588740; doi:10.1186/s13058-017-0897-3), 2017-09-06

**Figure S3**

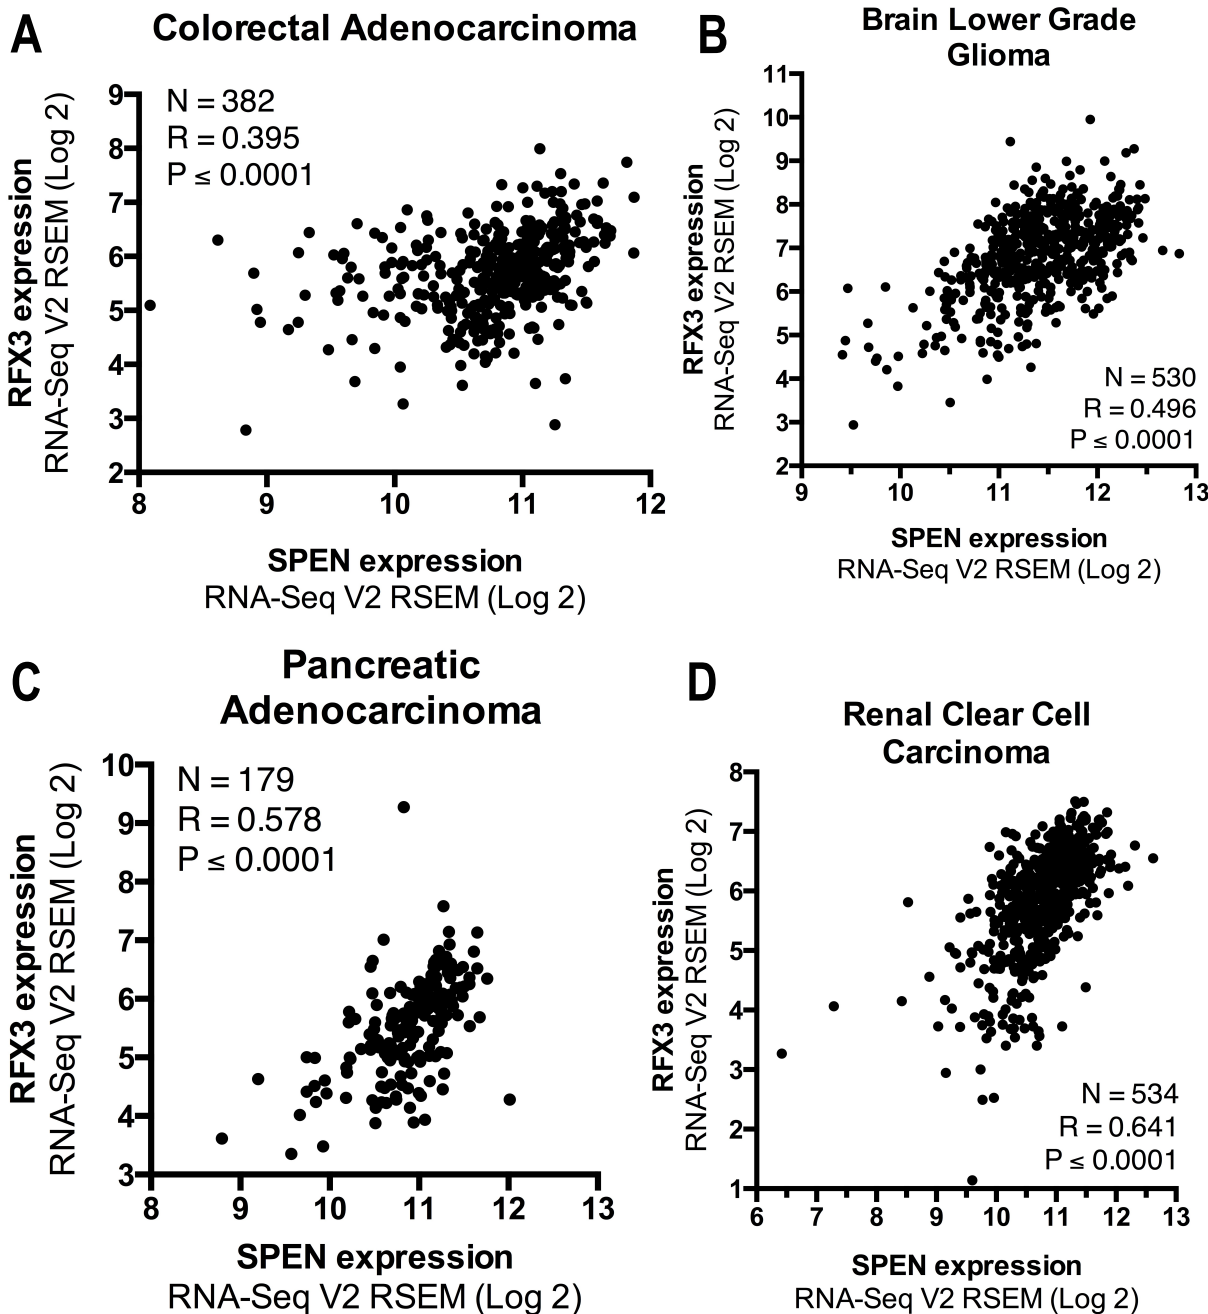

Supplement: 13058_2017_897_MOESM4_ESM.pdf [file 13058_2017_897_MOESM4_ESM.pdf]
