# Supplementary material for: SPEN, a new player in primary cilia formation and cell migration in breast cancer
Source: Springer Nature journal article supplement (doi:10.1186/s13058-017-0897-3), 2017-09-06

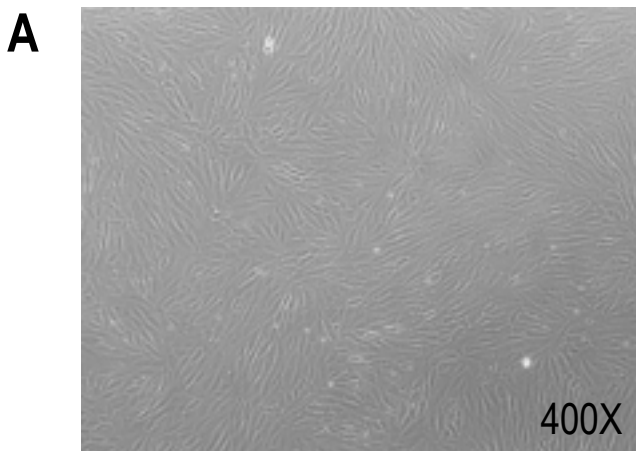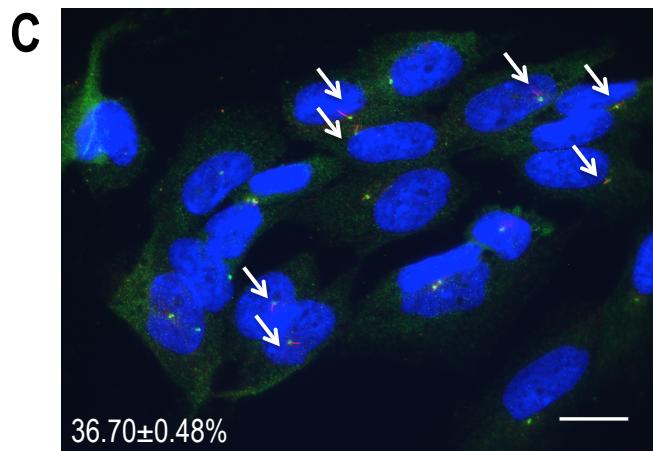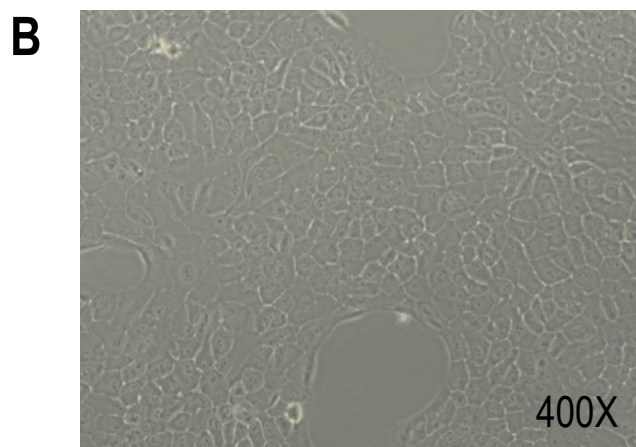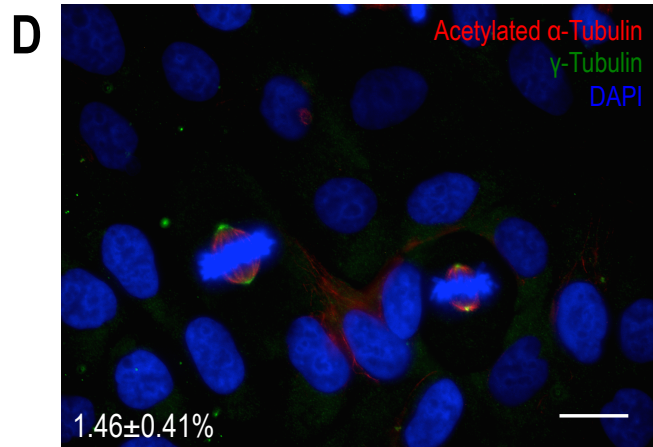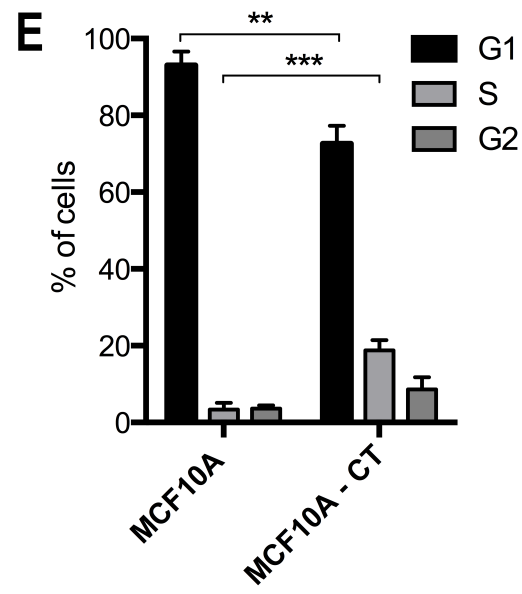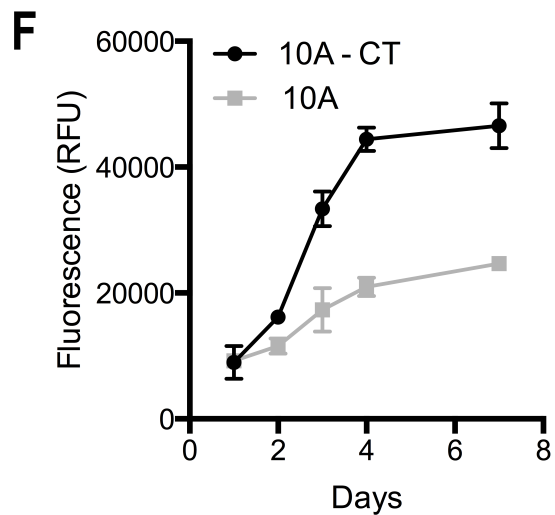

Supplement: MOESM2 [file 15018546]
